# Supplementary material for: Antiferromagnetic Fe3As nanostructure with a unique planar Fe arrangement
Source: Royal Society of Chemistry journal article supplement (doi:10.1039/d3tc03476c), 2023-01-01
Supplement: d3tc03476c1.pdf [file d3tc03476c1.pdf]

## Supplementary Information

# Antiferromagnetic Fe<sub>3</sub>As nanostructure with a unique planar Fe arrangement

cXu Yan<sup>1,†</sup>, Fanjunjie Han<sup>2,†</sup>, Yong Liu<sup>1</sup>, and Guochun Yang<sup>1,2,3\*</sup>

<sup>1</sup>State Key Laboratory of Metastable Materials Science & Technology and Key Laboratory for Microstructural Material Physics of Hebei Province, School of Science, Yanshan University, Qinhuangdao 066004, China

<sup>2</sup>Centre for Advanced Optoelectronic Functional Materials Research and Key Laboratory for UV Light-Emitting Materials and Technology of Northeast Normal University, Changchun 130024, China

<sup>3</sup>Key Laboratory of Functional Materials Physics and Chemistry of the Ministry of Education, College of Physics, and National Demonstration Center for Experimental Physics Education, Jilin Normal University, Changchun 130103, P. R. China

| Index                                                                                                              | page |
|--------------------------------------------------------------------------------------------------------------------|------|
| 1. Computational details.....                                                                                      | 2    |
| 2. ELF and the difference charge density of the Fe <sub>3</sub> As monolayer.....                                  | 5    |
| 3. Phonon dispersion curves of the Fe <sub>3</sub> As monolayer at 300 and 500 K .....                             | 5    |
| 4. Eleven different magnetic configurations of the Fe <sub>3</sub> As monolayer in a 2×2×1 supercell .....         | 6    |
| 5. Spin charge density of the Fe <sub>3</sub> As monolayer .....                                                   | 6    |
| 6. PDOS of the Fe <sub>3</sub> As monolayer.....                                                                   | 7    |
| 7. IPDOS of Fe <i>d</i> orbitals .....                                                                             | 7    |
| 8. $T_N$ of the Fe <sub>3</sub> As monolayer including $J_1$ , $J_2$ , and $J_3$ .....                             | 8    |
| 9. Energy of each magnetic configurations of the Fe <sub>3</sub> As monolayer under biaxial strain .....           | 8    |
| 10. $T_N$ of the Fe <sub>3</sub> As monolayer under biaxial strain.....                                            | 9    |
| 11. $T_N$ of the Fe <sub>3</sub> As monolayer with the Hubbard on-site Coulomb potential values from 0 to 3 eV ... | 9    |
| 12. Elastic constants of the Fe <sub>3</sub> As monolayer .....                                                    | 10   |
| 13. Detailed information of the Fe <sub>3</sub> As monolayer under biaxial strain.....                             | 10   |

|                                                                           |           |
|---------------------------------------------------------------------------|-----------|
| <b>14. Structural information of the Fe<sub>3</sub>As monolayer .....</b> | <b>11</b> |
| <b>15. References .....</b>                                               | <b>12</b> |

## Computational Details

The particle swarm optimization (PSO) method within the evolutionary algorithm as implemented in the Crystal structure Analysis by Particle Swarm Optimization (CALYPSO) code<sup>1,2</sup> was employed to find the lowest energy structures of  $\text{Fe}_x\text{As}$  ( $x = 3$  and  $4$ ) monolayers. Unit cells containing 2 and 4 formula units (f.u.) with buckled and planar structures were considered. In the first step, random structures with certain symmetry were constructed in which atomic coordinates were generated by the crystallographic symmetry operations. Local optimizations using the VASP code<sup>3</sup> were done with the conjugate gradients method and stopped when Gibbs free energy changes became smaller than  $1 \times 10^{-6}$  eV per cell. After processing the first-generation structures, 60% of them with lower enthalpies were selected to construct the next generation structures by Particle Swarm Optimization (PSO). 40% of the structures in the new generation were randomly generated. A structure fingerprinting technique of bond characterization matrix was applied to the generated structures, so that identical structures were strictly forbidden. These procedures significantly enhance the diversity of the structures, which is crucial for structural global search efficiency. In most cases, structural searching simulations for each calculation were stopped after generating 1000 ~ 1200 structures (e.g., about 20 ~ 30 generations). The local structural relaxations and electronic properties calculations were performed in the framework of the density functional theory (DFT)<sup>4</sup> within the generalized gradient approximation (GGA)<sup>5</sup> as implemented in the VASP code. The  $3d^74s^1$  and  $4s^24p^3$  atomic orbitals were treated as valence states for Fe and As, respectively. The cut-off energy for the expansion of wavefunctions into plane waves was set to 450 eV in calculations. Phonon calculations were performed for a  $3 \times 3 \times 1$  supercell for  $\text{Fe}_3\text{As}$  by using a supercell approach with the finite displacement method<sup>6</sup> as implemented in the PHONOPY code.<sup>7</sup> First-principles molecular dynamics (MD) simulations<sup>8</sup> for a  $4 \times 4 \times 1$   $\text{Fe}_3\text{As}$  supercell were performed in NVT ensemble lasted for 6 ps with a time step of 1 fs at 500 K. The temperature was controlled by using the Nosé-Hoover method. The Monte Carlo simulations based on the Ising model were performed using the MCSOLVER package.<sup>9</sup> The VASPKIT code<sup>10</sup> were used for pre- and post-processing calculations.

## Mechanical stability

$$\varepsilon = \frac{a - a_0}{a_0} \times 100\% = \frac{b - b_0}{b_0} \times 100\%$$

The strain was defined as, , where  $a, b$  and  $a_0, b_0$  are the lattice constants of the unit cell under strain and at equilibrium, respectively. Positive and negative value match to biaxial tensile and compressive strain, separately.

To further verify the mechanical stability of the Fe<sub>3</sub>As monolayer, we calculated its elastic constants<sup>11,12</sup>. Based on Born criteria<sup>13</sup>, the elastic constant constitutes a symmetric 6 × 6 tensor matrix in the linear elastic range. The elastic constants were calculated to be  $C_{11} = 102.362$  N/m,  $C_{22} = 98.088$  N/m,  $C_{12} = 35.157$  N/m, and  $C_{66} = 29.612$  N/m.  $C_{11}, C_{66} > 0$  and  $C_{11}C_{22} - C_{12}^2 > 0$ , confirming the Fe<sub>3</sub>As monolayer is mechanically stable. The mechanical performance was explored by the in-plane Young's modulus  $Y(\theta)$  and Poisson's ratio  $\nu(\theta)$  as follows

$$Y(\theta) = \frac{C_{11}C_{22} - C_{12}^2}{C_{11}s^4 + C_{22}c^4 + As^2c^2}$$

$$\nu(\theta) = \frac{Bc^2s^2 - C_{12}(c^4 + s^4)}{C_{11}s^4 + C_{22}c^4 + As^2c^2}$$

where

$$s = \sin\theta$$

$$c = \cos\theta$$

$$A = (C_{11}C_{22} - C_{12}^2)/C_{66} - 2C_{12}$$

$$B = C_{11} + C_{22} - (C_{11}C_{22} - C_{12}^2)/C_{66}$$

## Cohesive energy calculation

We used the following formula to calculate the cohesive energy per atom

$$E_{\text{coh}} = \frac{3E_{\text{Fe}} + E_{\text{As}} - E_{\text{Fe}_3\text{As}}}{4}$$

where  $E_{\text{Fe}}$ ,  $E_{\text{As}}$ , and  $E_{\text{Fe}_3\text{As}}$  are the energies of the Fe, As atom, and Fe<sub>3</sub>As unit cell, respectively.

## Magnetic coupling parameters calculation

Here, the effective spin Hamiltonian was defined as

$$\hat{H} = \sum_{ij} J_1 \vec{S}_i \vec{S}_j + \sum_{jk} J_2 \vec{S}_j \vec{S}_k + \sum_{jm} J_3 \vec{S}_j \vec{S}_m + \sum_{kk} J_4 \vec{S}_k \vec{S}_k + \sum_{jj} J_5 \vec{S}_j \vec{S}_j + \sum_{km} J_6 \vec{S}_k \vec{S}_m + E_0$$

where  $J_s$  represent the magnetic coupling interaction parameter between adjacent Fe atoms,  $S$  is the spin of Fe atom, value as  $3/2$  here. In order to get the value of  $J_s$ , we considered the energy nine configurations in a  $2 \times 2 \times 1$  supercell with the following:

$$E_{\text{FM}} = -4J_1 S^2 - 16J_2 S^2 - 4J_3 S^2 - 4J_4 S^2 - 8J_5 S^2 - 16J_6 S^2 - 8J_7 S^2 - 4J_8 S^2 + E_0$$

$$E_{\text{AFM1}} = -4J_1 S^2 - 16J_2 S^2 + 4J_3 S^2 - 4J_4 S^2 - 8J_5 S^2 + 16J_6 S^2 + 8J_7 S^2 + 4J_8 S^2 + E_0$$

$$E_{\text{AFM2}} = 4J_1 S^2 + 4J_3 S^2 - 4J_4 S^2 - 8J_5 S^2 - 16J_6 S^2 + 8J_7 S^2 + 4J_8 S^2 + E_0$$

$$E_{\text{AFM3}} = -4J_1 S^2 - 4J_3 S^2 + 4J_4 S^2 + 8J_5 S^2 + 8J_7 S^2 - 4J_8 S^2 + E_0$$

$$E_{\text{AFM4}} = -4J_1 S^2 + 4J_3 S^2 + 4J_4 S^2 + 8J_5 S^2 - 8J_7 S^2 + 4J_8 S^2 + E_0$$

$$E_{\text{AFM5}} = -4J_1 S^2 - 4J_3 S^2 + 4J_4 S^2 + 8J_5 S^2 + 8J_7 S^2 + 4J_8 S^2 + E_0$$

$$E_{\text{AFM6}} = -4J_1 S^2 + 4J_3 S^2 + 4J_4 S^2 + 8J_5 S^2 - 8J_7 S^2 - 4J_8 S^2 + E_0$$

$$E_{\text{FIM2}} = 4J_1 S^2 + 4J_3 S^2 - 4J_4 S^2 - 8J_5 S^2 + 8J_7 S^2 - 4J_8 S^2 + E_0$$

$$E_{\text{FIM3}} = -4J_1S^2 - 4J_3S^2 - 4J_4S^2 + 8J_5S^2 + 8J_7S^2 - 4J_8S^2 + E_0$$

## Supplementary Figures

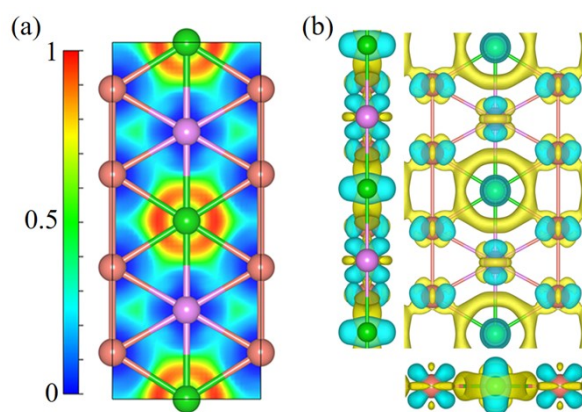

**Fig. S1** (a) Electron localization function (ELF) and (b) difference charge density of the Fe<sub>3</sub>As monolayer, in which cyan and yellow areas represent electron gains and losses, respectively.

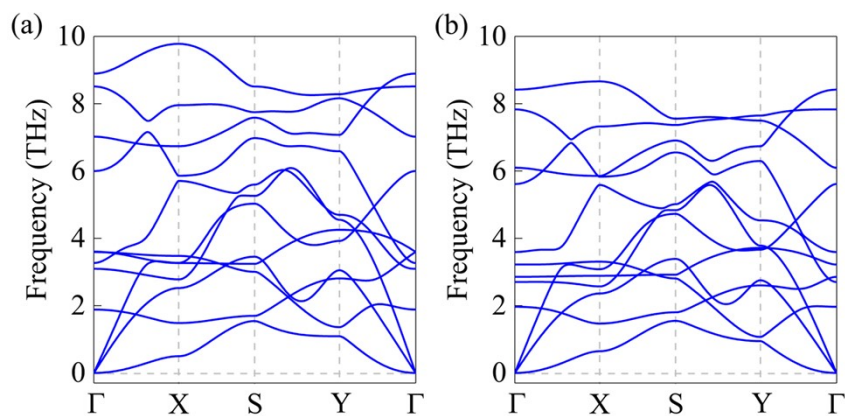

**Fig. S2** Phonon dispersion curves of the Fe<sub>3</sub>As monolayer at (a) 300 and (b) 500 K, respectively.

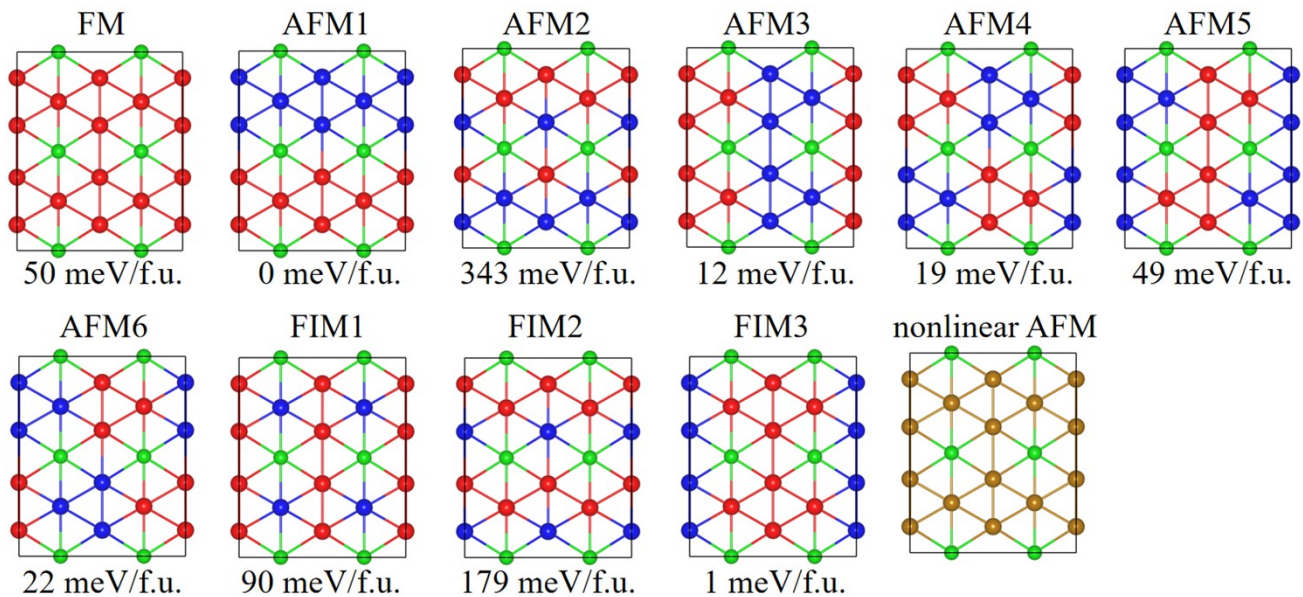

**Fig. S3** Eleven different magnetic configurations of the  $\text{Fe}_3\text{As}$  monolayer and their corresponding energies. The red and blue balls represent spin-up and spin-down Fe atoms, respectively.

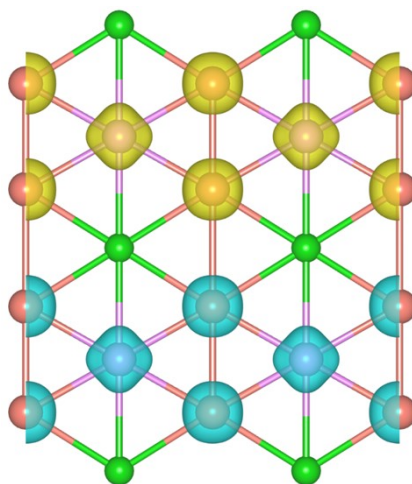

**Fig. S4** Spin charge density of the  $\text{Fe}_3\text{As}$  monolayer, in which the blue and yellow isosurfaces represent different spin states.



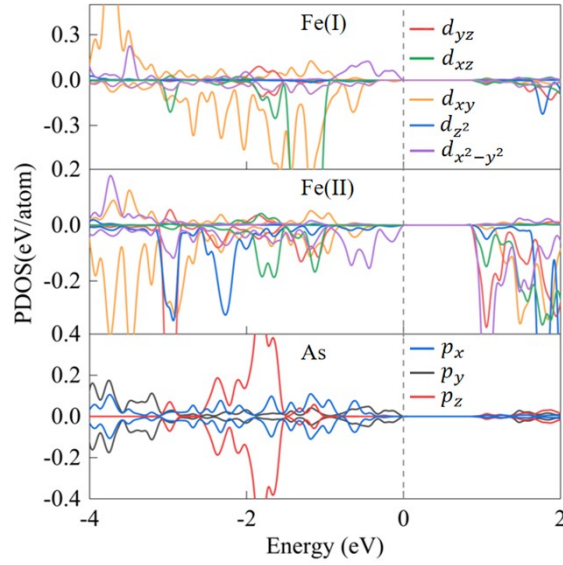

**Fig. S5** Partial density of states (PDOS) of Fe and As atoms in the  $\text{Fe}_3\text{As}$  monolayer. The Fermi level is set to zero.

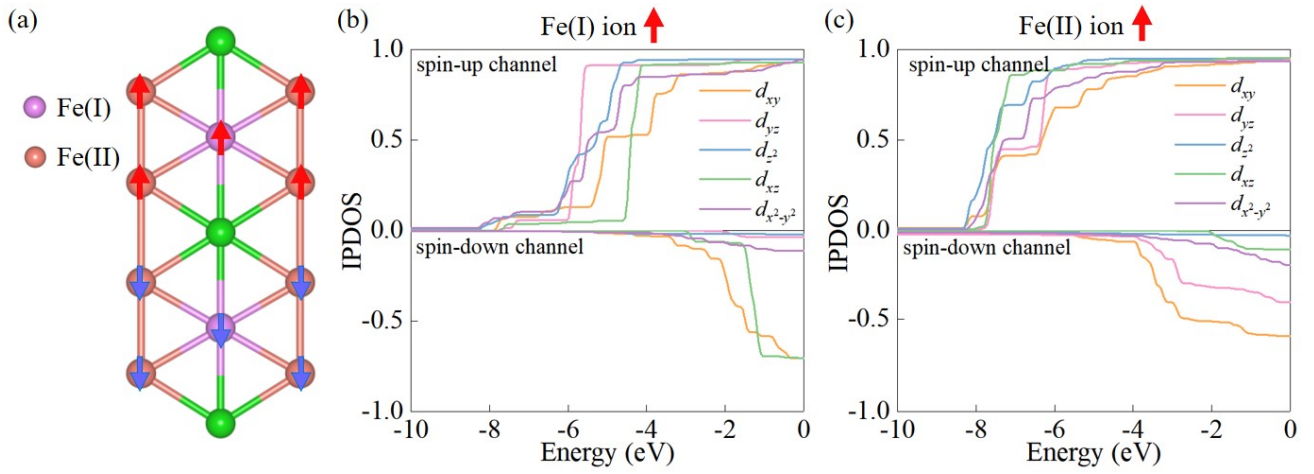

**Fig. S6** (a) Magnetic ground-state configuration of the  $\text{Fe}_3\text{As}$  monolayer. IPDOS of  $d$  orbital for (b) Fe(I) and (c) Fe(II) atoms.

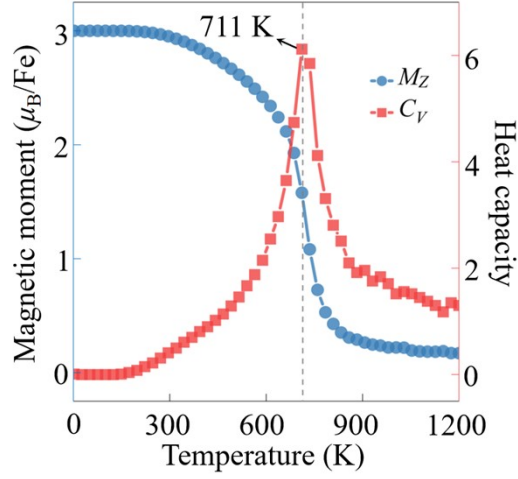

**Fig. S7** The temperature-depended  $M_Z$  of each Fe ion and the  $C_V$  of the  $\text{Fe}_3\text{As}$  monolayer including  $J_1$ ,  $J_2$ , and  $J_3$ .

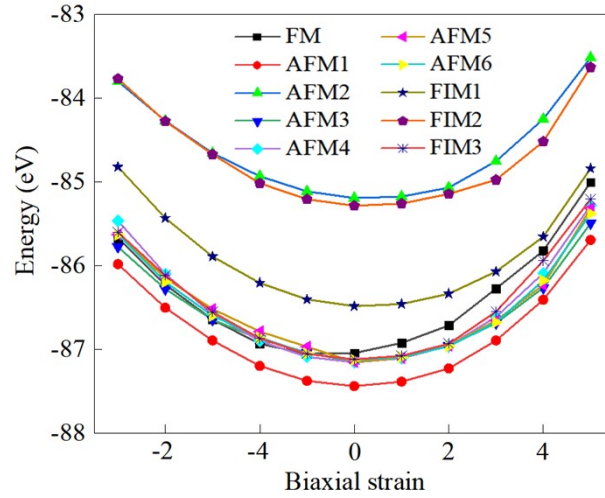

**Fig. S8** Energies of each magnetic states of the  $\text{Fe}_3\text{As}$  monolayer from -5% to 5% biaxial strain.

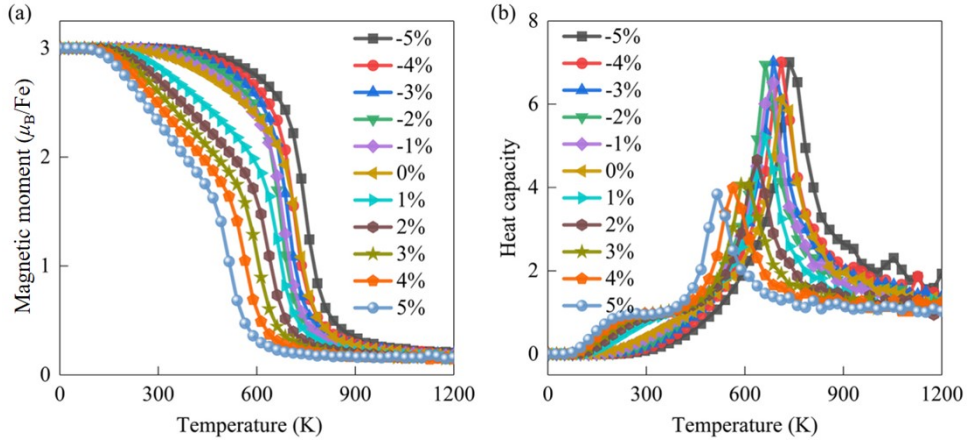

**Fig. S9** The temperature-depended  $M_Z$  (a) and  $C_V$  (b) the  $\text{Fe}_3\text{As}$  monolayer under biaxial strain.

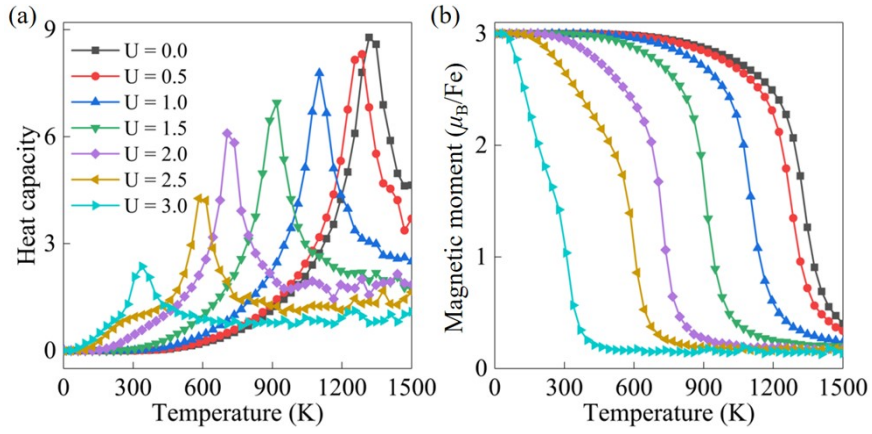

**Fig. S10** The temperature-depended  $C_V$  (a) and  $M_Z$  (b) of the  $\text{Fe}_3\text{As}$  monolayer with the Hubbard on-site Coulomb potential ( $U$ ) values from 0 to 3 eV.

## Supplementary Tables

**Table S1** Elastic constants (N/m) of the Fe<sub>3</sub>As monolayer.

| $C_{11}$ | $C_{12}/C_{21}$ | $C_{22}$ | $C_{66}$ |
|----------|-----------------|----------|----------|
| 102.362  | 35.157          | 98.088   | 29.612   |

**Table S2** The band gap (eV), magnetic moment ( $M$  in  $\mu_B/\text{Fe}$ ), exchange coupling parameters ( $J$ s in meV), and Néel temperature ( $T_N$  in K) of the Fe<sub>3</sub>As monolayer under biaxial strain.

|     | <b>Band-gap</b> | $M_{\text{Fe(I)}}$ | $M_{\text{Fe(II)}}$ | $J_1$  | $J_2$ | $J_3$   | $T_N$ |
|-----|-----------------|--------------------|---------------------|--------|-------|---------|-------|
| -5% | 0.09            | 2.85               | 2.83                | 87.79  | 10.49 | -13.08  | 735   |
| -4% | 0.02            | 3.17               | 3.36                | 92.62  | 9.41  | -13.598 | 711   |
| -3% | 1.20            | 3.46               | 3.27                | 96.40  | 8.81  | -13.95  | 687   |
| -2% | 0.88            | 3.04               | 3.02                | 99.53  | 8.30  | -14.01  | 662   |
| -1% | 0.84            | 3.11               | 3.50                | 101.75 | 7.28  | -17.16  | 687   |
| 0   | 1.04            | 3.10               | 3.10                | 99.89  | 6.83  | -21.01  | 711   |
| 1%  | 1.03            | 3.11               | 3.54                | 103.34 | 5.00  | -24.38  | 662   |
| 2%  | 1.10            | 3.15               | 3.17                | 102.40 | 4.27  | -25.96  | 638   |
| 3%  | 1.14            | 3.11               | 3.58                | 100.26 | 3.79  | -26.14  | 589   |
| 4%  | 1.10            | 3.12               | 3.59                | 97.38  | 3.41  | -25.51  | 564   |
| 5%  | 1.16            | 3.21               | 3.25                | 94.10  | 2.98  | -24.32  | 515   |

**Table S3** Structural information of the Fe<sub>3</sub>As monolayer.

| Phase              | Space Group | Lattice Parameters<br>(Å, °)             | Wyckoff Positions<br>(fractional) |          |          |          |
|--------------------|-------------|------------------------------------------|-----------------------------------|----------|----------|----------|
|                    |             |                                          | Atoms                             | <i>x</i> | <i>y</i> | <i>z</i> |
| Fe <sub>3</sub> As | <i>Pmmm</i> | <i>a</i> = 4.1655                        | Fe(1 <i>h</i> )                   | 0.50000  | 0.50000  | 0.50000  |
|                    |             | <i>b</i> = 4.6435                        | Fe(2 <i>n</i> )                   | 0.25978  | 0.50000  | 0.50000  |
|                    |             | <i>α</i> = <i>β</i> = <i>γ</i> = 90.0000 | As(1 <i>d</i> )                   | 0.50000  | 0.00000  | 0.50000  |

## References

- 1 Y. Wang, J. Lv, L. Zhu and Y. Ma, *Comput. Phys. Commun.*, 2012, **183**, 2063-2070.
- 2 Y. Wang, J. Lv, L. Zhu and Y. Ma, *Phys. Rev. B*, 2010, **82**, 094116.
- 3 G. Kresse and J. Furthmüller, *Phys. Rev. B*, 1996, **54**, 11169.
- 4 E. Baerends, *Theor. Chim. Acta*, 2000, **103**, 265-269.
- 5 J. P. Perdew, K. Burke and M. Ernzerhof, *Phys. Rev. Lett.*, 1996, **77**, 3865.
- 6 K. Parlinski, Z. Q. Li and Y. Kawazoe, *Phys. Rev. Lett.*, 1997, **78**, 4063.
- 7 A. Togo, F. Oba and I. Tanaka, *Phys. Rev. B*, 2008, **78**, 134106.
- 8 G. Martyna, M. Klein and M. Tuckerman, *J. Chem. Phys.*, 1992, **97**, 2635-2643.
- 9 L. Liu, X. Ren, J. Xie, B. Cheng, W. Liu, T. An, H. Qin and J. Hu, *Appl. Surf. Sci.*, 2019, **480**, 300-307.
- 10 V. Wang, N. Xu, J.-C. Liu, G. Tang and W.-T. Geng, *Comput. Phys. Commun.*, 2021, **267**, 108033.
- 11 C. S. Liu, H. H. Zhu, X. J. Ye and X. H. Yan, *Nanoscale*, 2017, **9**, 5854-5858.
- 12 Y. Jiao, F. Ma, J. Bell, A. Bilic and A. Du, *Angew. Chem. Int. Ed.*, 2016, **55**, 1-5.
- 13 J. Wang, S. Yip, S. R. Phillpot and D. Wolf, *Phys. Rev. Lett.*, 1993, **71**, 4182-4185.
